# Supplementary material
Source: Research Square preprint supplement (doi:10.21203/rs.3.rs-9189213/v1)
Supplement: Supplementary file 1 [file cea247e430463904fc688811.docx]

# Appendix

The appendix summarises supplementary analyses on missing data, APC specification, IC inclusion weighting, weighted IC trajectories, trajectory robustness, and subgroup APC results.

**Appendix Table S1. Missing-data profile, Little’s MCAR test, and sensitivity strategy**

| **Item** | **Value** |
| --- | --- |
| Any missing FI component within retained waves | 13.8% of person-waves; item-level range 0.4%-3.6% |
| Any missing CES-D-10 item within retained waves | 8.9% of person-waves; item-level range 0.6%-2.4% |
| Any missing core covariate in analytic variables | 4.7% of baseline participants |
| Little's MCAR test | Chi-square 462.3, df 128, P<0.001 |
| Main analysis | Complete outcome-covariate records; FI scored on observed deficits when at least 80% of items were present; CES-D-10 prorated when one or two items were missing |
| Sensitivity analysis | Twenty-cycle multiple imputation by chained equations, inverse-probability-of-censoring weighting, and wave-exclusion analyses; substantive conclusions unchanged |

Note: MCAR, missing completely at random. The significant Little's test indicated that a strict MCAR assumption was implausible, which motivated the imputation and weighting sensitivity analyses.

**Appendix Table S2. APC assumption checks, exclude-2020 sensitivity, and attrition diagnostics**

| **Analysis** | **FI** | **CES-D-10** | **Interpretation** |
| --- | --- | --- | --- |
| Likelihood-ratio test for age × period terms | Chi-square 7.84, P=0.165 | Chi-square 8.94, P=0.111 | No strong evidence that the age slope differed materially across periods |
| Likelihood-ratio test for age × cohort terms | Chi-square 8.69, P=0.191 | Chi-square 6.52, P=0.368 | No strong evidence that the age slope differed materially across cohorts |
| Age effect after excluding 2020 wave | β 0.0047 (95% CI 0.0040 to 0.0054) | β 0.081 (95% CI 0.056 to 0.106) | Core age gradients remained stable |
| 2020 period deviation after IPCW | 0.0121 (95% CI 0.0046 to 0.0196) | 1.28 (95% CI 0.74 to 1.82) | Attrition weighting did not remove the 2020 deviation |
| Baseline age among those missing by 2020 vs retained | 67.6 vs 65.8 years | 67.6 vs 65.8 years | Those lost before 2020 were older |
| Baseline FI among those missing by 2020 vs retained | 0.125 vs 0.104 | 0.125 vs 0.104 | Attrition was health-selective |
| Baseline CES-D-10 among those missing by 2020 vs retained | 8.86 vs 7.93 | 8.86 vs 7.93 | Attrition likely attenuated rather than generated adverse period estimates |

Note: IPCW, inverse-probability-of-censoring weighting. These checks supported retaining the main HAPC specification while interpreting period and cohort terms descriptively.

**Appendix Table S3. Balance before and after inverse-probability weighting for IC inclusion**

| **Weighting status** | **Age SMD** | **FI SMD** | **CES-D-10 SMD** | **Chronic disease SMD** | **Self-rated health SMD** | **Interpretation** |
| --- | --- | --- | --- | --- | --- | --- |
| Before weighting | 0.21 | 0.18 | 0.13 | 0.10 | 0.12 | IC subset was younger and healthier |
| After weighting | 0.05 | 0.04 | 0.03 | 0.04 | 0.05 | All standardised mean differences <0.10 |

Note: The inclusion model incorporated age, sex, marital status, residence, education, baseline FI, baseline CES-D-10, chronic disease count, self-rated health, ADL/IADL limitation, and indicators of later attrition or death.

**Appendix Table S4. Factor-score weighted IC sensitivity and weighted IC trajectories**

| **Model / class** | **Class n (%) or estimate** | **Key parameter** | **95% CI / note** | **Interpretation** |
| --- | --- | --- | --- | --- |
| Weighted IC score | — | Age β -0.071 | -0.081 to -0.061 | Factor-score weighting preserved the age gradient |
| Weighted IC LCGA: high-stable | 1,518 (46.2) | Slope -0.15 | -0.21 to -0.10 | Class size and slope were close to the unweighted solution |
| Weighted IC LCGA: moderate-declining | 1,261 (38.4) | Slope -0.25 | -0.32 to -0.18 | Intermediate class remained stable |
| Weighted IC LCGA: low-declining | 505 (15.4) | Slope -0.42 | -0.58 to -0.26 | High-risk IC class proportion changed minimally |
| Low education predicting weighted low-declining IC class | OR 1.72 | 95% CI 1.29 to 2.30 | — | Education remained a robust predictor after weighting |
| Multimorbidity predicting weighted low-declining IC class | OR 1.36 | 95% CI 1.18 to 1.57 | — | Chronic disease burden remained a robust predictor after weighting |

Note: The weighted trajectory solution supported the same three-class structure and broadly the same predictor profile as the unweighted IC analysis.

**Appendix Table S5. Additional LCGA robustness analyses and death-related sensitivity checks**

| **Analysis** | **FI** | **CES-D-10** | **IC** | **Interpretation** |
| --- | --- | --- | --- | --- |
| Quadratic LCGA BIC vs linear LCGA | 39,081.6 vs 39,087.2 | Not primary outcome type | 23,371.8 vs 23,375.9 | Slight BIC improvement but no clinically distinct extra class |
| Quadratic term significance in selected class model | Only high-increasing class P=0.041 | — | Only low-declining class P=0.048 | Non-linearity was mild and did not alter class ordering |
| Negative-binomial growth mixture for CES-D-10 | — | Class proportions 49.9 / 35.9 / 14.2% | — | Count-model sensitivity reproduced the same three-class pattern |
| Known deaths through 2020 in baseline cohort | 223 | 223 | 96 in IC subset | Deaths were concentrated in worse baseline health groups |
| Share of decedents assigned to high-risk trajectory | FI 18.9% | CES-D-10 21.4% | IC 24.0% | Ignoring death likely underestimates the burden of high-risk classes |
| Terminal-event sensitivity (high-risk class proportion) | 10.1% vs 9.3% | 14.7% vs 14.0% | 15.9% vs 15.3% | Main conclusions were unchanged but adverse classes increased slightly |

Note: The death sensitivity analysis treated death as an adverse terminal event in post-classification weighting rather than fitting a fully joint latent class-survival model.

**Appendix Table S6. Urban-rural and regional subgroup APC analyses**

| **Subgroup** | **FI age β** | **CES-D-10 age β** | **CES-D-10 2020 period deviation** | **Interpretation** |
| --- | --- | --- | --- | --- |
| Urban | 0.0044 | 0.072 | 0.83 | Age remained dominant, with a smaller 2020 depressive-symptom deviation |
| Rural | 0.0051 | 0.091 | 1.39 | Age gradients and 2020 contextual elevation were somewhat stronger |
| Eastern region | 0.0043 | 0.070 | 0.88 | Adverse period deviation was present but smaller |
| Central region | 0.0048 | 0.083 | 1.17 | Intermediate contextual deviation |
| Western region | 0.0052 | 0.097 | 1.42 | The strongest contextual deviation was observed in the west |

Note: Region-specific models were adjusted for the same covariates as the primary models. Interaction contrasts were modest and did not overturn the main interpretation that ageing remained the dominant temporal process.
